# Supplementary material
Source: Springer Nature journal article supplement (https://www.springermedizin.de/resource/supplementary/13256_2008_1277_MOESM2_ESM.pdf/9647400)

MEDCOM RESAMPLED  
[H]

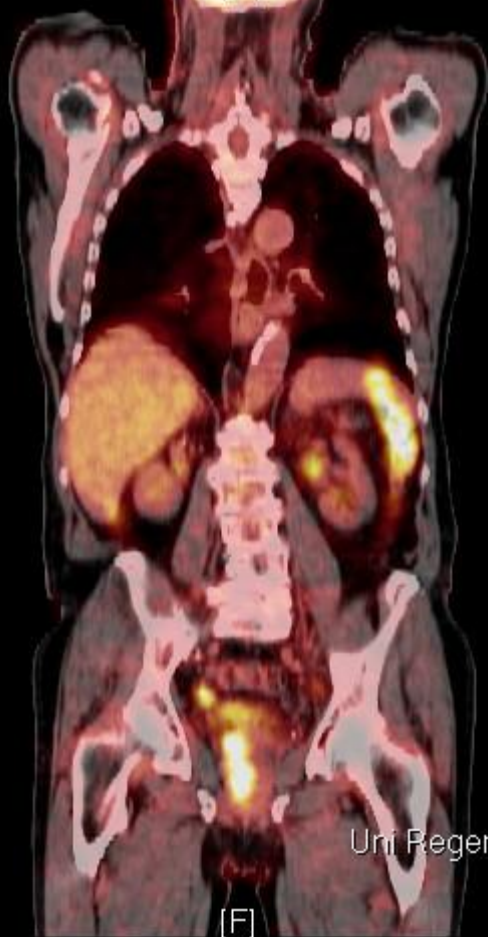

Supplement: MOESM2 [file 9647400]
